# Supplementary material for: Altered cerebrospinal fluid-based clearance mechanisms in aging autistic adults
Source: Research Square preprint supplement (doi:10.21203/rs.3.rs-9450979/v1), 2026-04-20
Supplement: Supplementary file 1 [file 02427e6c87cdf47e940b320c.docx]

**Supplementary Table 1. Linear regression results of WM-PVS in the frontal lobe**

| **Metric** | **Lobe** | **Mask** | **LH/RH** | **Term** | ***β*** | **SE** | ***t*** | ***p-perm*** |
| --- | --- | --- | --- | --- | --- | --- | --- | --- |
| CF | Frontal | caudalmiddlefrontal | LH | Group | -0.0002 | 0.0002 | -0.95 | 0.357 |
| CF | Frontal | caudalmiddlefrontal | LH | Age | 0.0000 | 0.0000 | 0.51 | 0.616 |
| CF | Frontal | caudalmiddlefrontal | LH | Group*Age | 0.0000 | 0.0000 | 0.18 | 0.852 |
| CF | Frontal | caudalmiddlefrontal | RH | Group | 0.0002 | 0.0002 | 1.08 | 0.288 |
| CF | Frontal | caudalmiddlefrontal | RH | Age | 0.0000 | 0.0000 | -0.36 | 0.727 |
| CF | Frontal | caudalmiddlefrontal | RH | Group*Age | 0.0000 | 0.0000 | -0.72 | 0.477 |
| DM | Frontal | caudalmiddlefrontal | LH | Group | 0.0120 | 0.0275 | 0.43 | 0.659 |
| DM | Frontal | caudalmiddlefrontal | LH | Age | 0.0041 | 0.0016 | 2.62 | 0.010 |
| DM | Frontal | caudalmiddlefrontal | LH | Group*Age | 0.0034 | 0.0024 | 1.39 | 0.168 |
| DM | Frontal | caudalmiddlefrontal | RH | Group | -0.0246 | 0.0317 | -0.78 | 0.447 |
| DM | Frontal | caudalmiddlefrontal | RH | Age | 0.0034 | 0.0018 | 1.86 | 0.064 |
| DM | Frontal | caudalmiddlefrontal | RH | Group*Age | 0.0020 | 0.0028 | 0.70 | 0.485 |
| VF | Frontal | caudalmiddlefrontal | LH | Group | 0.0001 | 0.0010 | 0.08 | 0.939 |
| VF | Frontal | caudalmiddlefrontal | LH | Age | 0.0001 | 0.0001 | 2.48 | 0.017 |
| VF | Frontal | caudalmiddlefrontal | LH | Group*Age | 0.0001 | 0.0001 | 1.38 | 0.180 |
| VF | Frontal | caudalmiddlefrontal | RH | Group | 0.0001 | 0.0009 | 0.12 | 0.906 |
| VF | Frontal | caudalmiddlefrontal | RH | Age | 0.0001 | 0.0001 | 1.22 | 0.236 |
| VF | Frontal | caudalmiddlefrontal | RH | Group*Age | 0.0000 | 0.0001 | 0.14 | 0.887 |
| CF | Frontal | frontalpole | LH | Group | 0.0000 | 0.0002 | -0.08 | 0.931 |
| CF | Frontal | frontalpole | LH | Age | 0.0000 | 0.0000 | 0.77 | 0.443 |
| CF | Frontal | frontalpole | LH | Group*Age | 0.0000 | 0.0000 | 0.25 | 0.813 |
| CF | Frontal | frontalpole | RH | Group | 0.0000 | 0.0002 | 0.06 | 0.954 |
| CF | Frontal | frontalpole | RH | Age | 0.0000 | 0.0000 | -0.33 | 0.741 |
| CF | Frontal | frontalpole | RH | Group*Age | 0.0000 | 0.0000 | 0.36 | 0.728 |
| DM | Frontal | frontalpole | LH | Group | -0.0997 | 0.1424 | -0.70 | 0.479 |
| DM | Frontal | frontalpole | LH | Age | 0.0065 | 0.0082 | 0.80 | 0.432 |
| DM | Frontal | frontalpole | LH | Group*Age | -0.0017 | 0.0127 | -0.13 | 0.896 |
| DM | Frontal | frontalpole | RH | Group | -0.0728 | 0.1407 | -0.52 | 0.602 |
| DM | Frontal | frontalpole | RH | Age | -0.0060 | 0.0081 | -0.74 | 0.461 |
| DM | Frontal | frontalpole | RH | Group*Age | -0.0006 | 0.0125 | -0.04 | 0.965 |
| VF | Frontal | frontalpole | LH | Group | 0.0001 | 0.0005 | 0.23 | 0.820 |
| VF | Frontal | frontalpole | LH | Age | 0.0000 | 0.0000 | 0.21 | 0.837 |
| VF | Frontal | frontalpole | LH | Group*Age | 0.0000 | 0.0000 | 0.03 | 0.980 |
| VF | Frontal | frontalpole | RH | Group | 0.0004 | 0.0006 | 0.59 | 0.582 |
| VF | Frontal | frontalpole | RH | Age | 0.0000 | 0.0000 | -0.62 | 0.546 |
| VF | Frontal | frontalpole | RH | Group*Age | 0.0001 | 0.0001 | 1.14 | 0.268 |
| CF | Frontal | lateralorbitofrontal | LH | Group | 0.0001 | 0.0002 | 0.32 | 0.745 |
| CF | Frontal | lateralorbitofrontal | LH | Age | 0.0000 | 0.0000 | -1.18 | 0.250 |
| CF | Frontal | lateralorbitofrontal | LH | Group*Age | 0.0000 | 0.0000 | -0.21 | 0.843 |
| CF | Frontal | lateralorbitofrontal | RH | Group | 0.0001 | 0.0002 | 0.59 | 0.563 |
| CF | Frontal | lateralorbitofrontal | RH | Age | 0.0000 | 0.0000 | -0.82 | 0.419 |
| CF | Frontal | lateralorbitofrontal | RH | Group*Age | 0.0000 | 0.0000 | -0.25 | 0.811 |
| DM | Frontal | lateralorbitofrontal | LH | Group | 0.0185 | 0.0188 | 0.99 | 0.323 |
| DM | Frontal | lateralorbitofrontal | LH | Age | 0.0011 | 0.0011 | 1.06 | 0.288 |
| DM | Frontal | lateralorbitofrontal | LH | Group*Age | 0.0007 | 0.0017 | 0.42 | 0.688 |
| DM | Frontal | lateralorbitofrontal | RH | Group | -0.0067 | 0.0196 | -0.34 | 0.736 |
| DM | Frontal | lateralorbitofrontal | RH | Age | 0.0019 | 0.0011 | 1.69 | 0.095 |
| DM | Frontal | lateralorbitofrontal | RH | Group*Age | 0.0011 | 0.0017 | 0.61 | 0.550 |
| VF | Frontal | lateralorbitofrontal | LH | Group | 0.0024 | 0.0016 | 1.46 | 0.145 |
| VF | Frontal | lateralorbitofrontal | LH | Age | 0.0000 | 0.0001 | -0.21 | 0.820 |
| VF | Frontal | lateralorbitofrontal | LH | Group*Age | 0.0000 | 0.0001 | -0.06 | 0.950 |
| VF | Frontal | lateralorbitofrontal | RH | Group | 0.0008 | 0.0013 | 0.60 | 0.547 |
| VF | Frontal | lateralorbitofrontal | RH | Age | 0.0000 | 0.0001 | 0.55 | 0.574 |
| VF | Frontal | lateralorbitofrontal | RH | Group*Age | 0.0000 | 0.0001 | -0.06 | 0.954 |
| CF | Frontal | medialorbitofrontal | LH | Group | 0.0002 | 0.0002 | 0.89 | 0.380 |
| CF | Frontal | medialorbitofrontal | LH | Age | 0.0000 | 0.0000 | -1.40 | 0.154 |
| CF | Frontal | medialorbitofrontal | LH | Group*Age | 0.0000 | 0.0000 | -0.03 | 0.973 |
| CF | Frontal | medialorbitofrontal | RH | Group | 0.0002 | 0.0003 | 0.92 | 0.352 |
| CF | Frontal | medialorbitofrontal | RH | Age | 0.0000 | 0.0000 | -0.95 | 0.348 |
| CF | Frontal | medialorbitofrontal | RH | Group*Age | 0.0000 | 0.0000 | -0.44 | 0.660 |
| DM | Frontal | medialorbitofrontal | LH | Group | -0.0116 | 0.0401 | -0.29 | 0.824 |
| DM | Frontal | medialorbitofrontal | LH | Age | 0.0007 | 0.0023 | 0.31 | 0.735 |
| DM | Frontal | medialorbitofrontal | LH | Group*Age | -0.0006 | 0.0036 | -0.16 | 0.890 |
| DM | Frontal | medialorbitofrontal | RH | Group | 0.0773 | 0.0491 | 1.57 | 0.135 |
| DM | Frontal | medialorbitofrontal | RH | Age | -0.0036 | 0.0028 | -1.29 | 0.195 |
| DM | Frontal | medialorbitofrontal | RH | Group*Age | 0.0058 | 0.0044 | 1.33 | 0.195 |
| VF | Frontal | medialorbitofrontal | LH | Group | 0.0023 | 0.0015 | 1.53 | 0.131 |
| VF | Frontal | medialorbitofrontal | LH | Age | 0.0000 | 0.0001 | -0.49 | 0.626 |
| VF | Frontal | medialorbitofrontal | LH | Group*Age | 0.0000 | 0.0001 | -0.35 | 0.740 |
| VF | Frontal | medialorbitofrontal | RH | Group | 0.0021 | 0.0012 | 1.74 | 0.081 |
| VF | Frontal | medialorbitofrontal | RH | Age | 0.0000 | 0.0001 | -0.22 | 0.818 |
| VF | Frontal | medialorbitofrontal | RH | Group*Age | 0.0000 | 0.0001 | -0.15 | 0.890 |
| CF | Frontal | paracentral | LH | Group | 0.0001 | 0.0003 | 0.27 | 0.778 |
| CF | Frontal | paracentral | LH | Age | 0.0000 | 0.0000 | 0.29 | 0.775 |
| CF | Frontal | paracentral | LH | Group*Age | 0.0000 | 0.0000 | -0.53 | 0.592 |
| CF | Frontal | paracentral | RH | Group | 0.0001 | 0.0003 | 0.46 | 0.640 |
| CF | Frontal | paracentral | RH | Age | 0.0000 | 0.0000 | -0.65 | 0.514 |
| CF | Frontal | paracentral | RH | Group*Age | 0.0000 | 0.0000 | -0.22 | 0.831 |
| DM | Frontal | paracentral | LH | Group | 0.0216 | 0.0363 | 0.60 | 0.555 |
| DM | Frontal | paracentral | LH | Age | 0.0040 | 0.0021 | 1.93 | 0.060 |
| DM | Frontal | paracentral | LH | Group*Age | 0.0013 | 0.0032 | 0.41 | 0.687 |
| DM | Frontal | paracentral | RH | Group | -0.0228 | 0.0443 | -0.51 | 0.668 |
| DM | Frontal | paracentral | RH | Age | 0.0044 | 0.0025 | 1.72 | 0.092 |
| DM | Frontal | paracentral | RH | Group*Age | 0.0005 | 0.0039 | 0.13 | 0.899 |
| VF | Frontal | paracentral | LH | Group | 0.0003 | 0.0009 | 0.33 | 0.741 |
| VF | Frontal | paracentral | LH | Age | 0.0001 | 0.0000 | 1.71 | 0.086 |
| VF | Frontal | paracentral | LH | Group*Age | 0.0000 | 0.0001 | -0.34 | 0.736 |
| VF | Frontal | paracentral | RH | Group | 0.0007 | 0.0010 | 0.69 | 0.496 |
| VF | Frontal | paracentral | RH | Age | 0.0001 | 0.0001 | 0.95 | 0.354 |
| VF | Frontal | paracentral | RH | Group*Age | 0.0000 | 0.0001 | -0.10 | 0.922 |
| CF | Frontal | parsopercularis | LH | Group | 0.0001 | 0.0002 | 0.49 | 0.632 |
| CF | Frontal | parsopercularis | LH | Age | 0.0000 | 0.0000 | 1.63 | 0.106 |
| CF | Frontal | parsopercularis | LH | Group*Age | 0.0000 | 0.0000 | -0.48 | 0.637 |
| CF | Frontal | parsopercularis | RH | Group | 0.0003 | 0.0002 | 1.82 | 0.067 |
| CF | Frontal | parsopercularis | RH | Age | 0.0000 | 0.0000 | 0.92 | 0.364 |
| CF | Frontal | parsopercularis | RH | Group*Age | 0.0000 | 0.0000 | 0.05 | 0.961 |
| DM | Frontal | parsopercularis | LH | Group | 0.0473 | 0.0338 | 1.40 | 0.172 |
| DM | Frontal | parsopercularis | LH | Age | 0.0031 | 0.0019 | 1.58 | 0.118 |
| DM | Frontal | parsopercularis | LH | Group*Age | 0.0066 | 0.0030 | 2.21 | 0.029 |
| DM | Frontal | parsopercularis | RH | Group | 0.0007 | 0.0352 | 0.02 | 0.983 |
| DM | Frontal | parsopercularis | RH | Age | 0.0045 | 0.0020 | 2.22 | 0.029 |
| DM | Frontal | parsopercularis | RH | Group*Age | 0.0019 | 0.0031 | 0.62 | 0.546 |
| VF | Frontal | parsopercularis | LH | Group | 0.0013 | 0.0012 | 1.11 | 0.279 |
| VF | Frontal | parsopercularis | LH | Age | 0.0002 | 0.0001 | 3.01 | 0.002 |
| VF | Frontal | parsopercularis | LH | Group*Age | 0.0000 | 0.0001 | 0.31 | 0.761 |
| VF | Frontal | parsopercularis | RH | Group | 0.0010 | 0.0011 | 0.95 | 0.340 |
| VF | Frontal | parsopercularis | RH | Age | 0.0001 | 0.0001 | 2.45 | 0.015 |
| VF | Frontal | parsopercularis | RH | Group*Age | 0.0001 | 0.0001 | 0.75 | 0.451 |
| CF | Frontal | parsorbitalis | LH | Group | 0.0006 | 0.0003 | 1.84 | 0.071 |
| CF | Frontal | parsorbitalis | LH | Age | 0.0000 | 0.0000 | 0.07 | 0.950 |
| CF | Frontal | parsorbitalis | LH | Group*Age | 0.0000 | 0.0000 | 0.62 | 0.537 |
| CF | Frontal | parsorbitalis | RH | Group | -0.0001 | 0.0002 | -0.26 | 0.803 |
| CF | Frontal | parsorbitalis | RH | Age | 0.0000 | 0.0000 | 1.14 | 0.253 |
| CF | Frontal | parsorbitalis | RH | Group*Age | 0.0000 | 0.0000 | -0.46 | 0.649 |
| DM | Frontal | parsorbitalis | LH | Group | -0.0711 | 0.1007 | -0.71 | 0.482 |
| DM | Frontal | parsorbitalis | LH | Age | 0.0017 | 0.0058 | 0.30 | 0.772 |
| DM | Frontal | parsorbitalis | LH | Group*Age | 0.0123 | 0.0089 | 1.38 | 0.176 |
| DM | Frontal | parsorbitalis | RH | Group | -0.0964 | 0.0978 | -0.98 | 0.336 |
| DM | Frontal | parsorbitalis | RH | Age | 0.0062 | 0.0056 | 1.10 | 0.266 |
| DM | Frontal | parsorbitalis | RH | Group*Age | -0.0012 | 0.0087 | -0.14 | 0.884 |
| VF | Frontal | parsorbitalis | LH | Group | 0.0021 | 0.0013 | 1.62 | 0.103 |
| VF | Frontal | parsorbitalis | LH | Age | 0.0000 | 0.0001 | 0.63 | 0.533 |
| VF | Frontal | parsorbitalis | LH | Group*Age | 0.0000 | 0.0001 | 0.12 | 0.907 |
| VF | Frontal | parsorbitalis | RH | Group | 0.0005 | 0.0011 | 0.47 | 0.645 |
| VF | Frontal | parsorbitalis | RH | Age | 0.0001 | 0.0001 | 1.90 | 0.062 |
| VF | Frontal | parsorbitalis | RH | Group*Age | 0.0000 | 0.0001 | -0.12 | 0.899 |
| CF | Frontal | parstriangularis | LH | Group | 0.0004 | 0.0003 | 1.50 | 0.130 |
| CF | Frontal | parstriangularis | LH | Age | 0.0000 | 0.0000 | 0.64 | 0.525 |
| CF | Frontal | parstriangularis | LH | Group*Age | 0.0000 | 0.0000 | -0.40 | 0.696 |
| CF | Frontal | parstriangularis | RH | Group | 0.0001 | 0.0002 | 0.61 | 0.542 |
| CF | Frontal | parstriangularis | RH | Age | 0.0000 | 0.0000 | 2.64 | 0.011 |
| CF | Frontal | parstriangularis | RH | Group*Age | 0.0000 | 0.0000 | -1.23 | 0.232 |
| DM | Frontal | parstriangularis | LH | Group | 0.0002 | 0.0259 | 0.01 | 0.992 |
| DM | Frontal | parstriangularis | LH | Age | 0.0041 | 0.0015 | 2.74 | 0.009 |
| DM | Frontal | parstriangularis | LH | Group*Age | -0.0006 | 0.0023 | -0.28 | 0.777 |
| DM | Frontal | parstriangularis | RH | Group | 0.0130 | 0.0316 | 0.41 | 0.680 |
| DM | Frontal | parstriangularis | RH | Age | 0.0054 | 0.0018 | 2.98 | 0.005 |
| DM | Frontal | parstriangularis | RH | Group*Age | -0.0013 | 0.0028 | -0.48 | 0.639 |
| VF | Frontal | parstriangularis | LH | Group | 0.0019 | 0.0013 | 1.49 | 0.146 |
| VF | Frontal | parstriangularis | LH | Age | 0.0001 | 0.0001 | 1.72 | 0.087 |
| VF | Frontal | parstriangularis | LH | Group*Age | 0.0000 | 0.0001 | -0.40 | 0.694 |
| VF | Frontal | parstriangularis | RH | Group | 0.0008 | 0.0009 | 0.95 | 0.344 |
| VF | Frontal | parstriangularis | RH | Age | 0.0002 | 0.0000 | 3.75 | 0.000 |
| VF | Frontal | parstriangularis | RH | Group*Age | -0.0001 | 0.0001 | -1.38 | 0.178 |
| CF | Frontal | precentral | LH | Group | -0.0001 | 0.0002 | -0.57 | 0.569 |
| CF | Frontal | precentral | LH | Age | 0.0000 | 0.0000 | 0.26 | 0.800 |
| CF | Frontal | precentral | LH | Group*Age | 0.0000 | 0.0000 | 0.35 | 0.727 |
| CF | Frontal | precentral | RH | Group | 0.0000 | 0.0002 | 0.25 | 0.808 |
| CF | Frontal | precentral | RH | Age | 0.0000 | 0.0000 | 0.80 | 0.426 |
| CF | Frontal | precentral | RH | Group*Age | 0.0000 | 0.0000 | -1.50 | 0.132 |
| DM | Frontal | precentral | LH | Group | -0.0133 | 0.0261 | -0.51 | 0.605 |
| DM | Frontal | precentral | LH | Age | 0.0029 | 0.0015 | 1.94 | 0.064 |
| DM | Frontal | precentral | LH | Group*Age | 0.0044 | 0.0023 | 1.89 | 0.064 |
| DM | Frontal | precentral | RH | Group | -0.0389 | 0.0270 | -1.44 | 0.159 |
| DM | Frontal | precentral | RH | Age | 0.0025 | 0.0016 | 1.63 | 0.105 |
| DM | Frontal | precentral | RH | Group*Age | 0.0033 | 0.0024 | 1.39 | 0.162 |
| VF | Frontal | precentral | LH | Group | -0.0007 | 0.0007 | -0.90 | 0.371 |
| VF | Frontal | precentral | LH | Age | 0.0001 | 0.0000 | 2.30 | 0.025 |
| VF | Frontal | precentral | LH | Group*Age | 0.0001 | 0.0001 | 1.56 | 0.124 |
| VF | Frontal | precentral | RH | Group | -0.0006 | 0.0007 | -0.77 | 0.436 |
| VF | Frontal | precentral | RH | Age | 0.0001 | 0.0000 | 2.08 | 0.039 |
| VF | Frontal | precentral | RH | Group*Age | 0.0000 | 0.0001 | -0.28 | 0.776 |
| CF | Frontal | rostralmiddlefrontal | LH | Group | 0.0003 | 0.0002 | 1.39 | 0.167 |
| CF | Frontal | rostralmiddlefrontal | LH | Age | 0.0000 | 0.0000 | 0.21 | 0.829 |
| CF | Frontal | rostralmiddlefrontal | LH | Group*Age | 0.0000 | 0.0000 | -0.44 | 0.643 |
| CF | Frontal | rostralmiddlefrontal | RH | Group | 0.0001 | 0.0002 | 0.70 | 0.476 |
| CF | Frontal | rostralmiddlefrontal | RH | Age | 0.0000 | 0.0000 | 0.42 | 0.677 |
| CF | Frontal | rostralmiddlefrontal | RH | Group*Age | 0.0000 | 0.0000 | -1.02 | 0.309 |
| DM | Frontal | rostralmiddlefrontal | LH | Group | -0.0133 | 0.0213 | -0.62 | 0.540 |
| DM | Frontal | rostralmiddlefrontal | LH | Age | 0.0039 | 0.0012 | 3.15 | 0.003 |
| DM | Frontal | rostralmiddlefrontal | LH | Group*Age | 0.0011 | 0.0019 | 0.58 | 0.566 |
| DM | Frontal | rostralmiddlefrontal | RH | Group | 0.0036 | 0.0177 | 0.20 | 0.843 |
| DM | Frontal | rostralmiddlefrontal | RH | Age | 0.0030 | 0.0010 | 2.97 | 0.004 |
| DM | Frontal | rostralmiddlefrontal | RH | Group*Age | 0.0019 | 0.0016 | 1.24 | 0.211 |
| VF | Frontal | rostralmiddlefrontal | LH | Group | 0.0021 | 0.0015 | 1.42 | 0.160 |
| VF | Frontal | rostralmiddlefrontal | LH | Age | 0.0001 | 0.0001 | 1.62 | 0.105 |
| VF | Frontal | rostralmiddlefrontal | LH | Group*Age | 0.0000 | 0.0001 | -0.28 | 0.785 |
| VF | Frontal | rostralmiddlefrontal | RH | Group | 0.0012 | 0.0012 | 0.98 | 0.329 |
| VF | Frontal | rostralmiddlefrontal | RH | Age | 0.0001 | 0.0001 | 1.42 | 0.167 |
| VF | Frontal | rostralmiddlefrontal | RH | Group*Age | 0.0000 | 0.0001 | -0.26 | 0.802 |
| CF | Frontal | superiorfrontal | LH | Group | 0.0000 | 0.0002 | 0.11 | 0.908 |
| CF | Frontal | superiorfrontal | LH | Age | 0.0000 | 0.0000 | 0.57 | 0.566 |
| CF | Frontal | superiorfrontal | LH | Group*Age | 0.0000 | 0.0000 | -0.90 | 0.364 |
| CF | Frontal | superiorfrontal | RH | Group | 0.0001 | 0.0002 | 0.57 | 0.564 |
| CF | Frontal | superiorfrontal | RH | Age | 0.0000 | 0.0000 | 0.76 | 0.459 |
| CF | Frontal | superiorfrontal | RH | Group*Age | 0.0000 | 0.0000 | -1.60 | 0.107 |
| DM | Frontal | superiorfrontal | LH | Group | -0.0263 | 0.0258 | -1.02 | 0.312 |
| DM | Frontal | superiorfrontal | LH | Age | 0.0027 | 0.0015 | 1.83 | 0.074 |
| DM | Frontal | superiorfrontal | LH | Group*Age | 0.0040 | 0.0023 | 1.74 | 0.088 |
| DM | Frontal | superiorfrontal | RH | Group | -0.0089 | 0.0256 | -0.35 | 0.734 |
| DM | Frontal | superiorfrontal | RH | Age | 0.0024 | 0.0015 | 1.66 | 0.095 |
| DM | Frontal | superiorfrontal | RH | Group*Age | 0.0042 | 0.0023 | 1.83 | 0.070 |
| VF | Frontal | superiorfrontal | LH | Group | -0.0002 | 0.0010 | -0.18 | 0.858 |
| VF | Frontal | superiorfrontal | LH | Age | 0.0001 | 0.0001 | 1.96 | 0.047 |
| VF | Frontal | superiorfrontal | LH | Group*Age | 0.0000 | 0.0001 | 0.50 | 0.620 |
| VF | Frontal | superiorfrontal | RH | Group | 0.0005 | 0.0008 | 0.56 | 0.582 |
| VF | Frontal | superiorfrontal | RH | Age | 0.0001 | 0.0000 | 2.27 | 0.026 |
| VF | Frontal | superiorfrontal | RH | Group*Age | 0.0000 | 0.0001 | 0.03 | 0.979 |

**Supplementary Table 2. Linear regression results of WM-PVS in the parietal lobe**

| **Metric** | **Lobe** | **Mask** | **LH/RH** | **Term** | ***β*** | **SE** | ***t*** | ***p-perm*** |
| --- | --- | --- | --- | --- | --- | --- | --- | --- |
| CF | Parietal | inferiorparietal | LH | Group | 0.0001 | 0.0001 | 0.94 | 0.352 |
| CF | Parietal | inferiorparietal | LH | Age | 0.0000 | 0.0000 | -0.22 | 0.838 |
| CF | Parietal | inferiorparietal | LH | Group*Age | 0.0000 | 0.0000 | 2.68 | 0.010 |
| CF | Parietal | inferiorparietal | RH | Group | 0.0002 | 0.0001 | 1.98 | 0.048 |
| CF | Parietal | inferiorparietal | RH | Age | 0.0000 | 0.0000 | 0.85 | 0.394 |
| CF | Parietal | inferiorparietal | RH | Group*Age | 0.0000 | 0.0000 | 0.38 | 0.696 |
| DM | Parietal | inferiorparietal | LH | Group | -0.0185 | 0.0356 | -0.52 | 0.609 |
| DM | Parietal | inferiorparietal | LH | Age | 0.0036 | 0.0020 | 1.77 | 0.079 |
| DM | Parietal | inferiorparietal | LH | Group*Age | 0.0069 | 0.0032 | 2.19 | 0.032 |
| DM | Parietal | inferiorparietal | RH | Group | -0.0409 | 0.0352 | -1.16 | 0.253 |
| DM | Parietal | inferiorparietal | RH | Age | 0.0048 | 0.0020 | 2.37 | 0.023 |
| DM | Parietal | inferiorparietal | RH | Group*Age | 0.0029 | 0.0031 | 0.93 | 0.357 |
| VF | Parietal | inferiorparietal | LH | Group | 0.0008 | 0.0009 | 0.86 | 0.399 |
| VF | Parietal | inferiorparietal | LH | Age | 0.0000 | 0.0001 | 0.83 | 0.410 |
| VF | Parietal | inferiorparietal | LH | Group*Age | 0.0003 | 0.0001 | 3.14 | 0.002 |
| VF | Parietal | inferiorparietal | RH | Group | 0.0004 | 0.0009 | 0.47 | 0.644 |
| VF | Parietal | inferiorparietal | RH | Age | 0.0001 | 0.0001 | 1.91 | 0.062 |
| VF | Parietal | inferiorparietal | RH | Group*Age | 0.0001 | 0.0001 | 1.01 | 0.319 |
| CF | Parietal | postcentral | LH | Group | 0.0000 | 0.0001 | 0.10 | 0.927 |
| CF | Parietal | postcentral | LH | Age | 0.0000 | 0.0000 | 0.79 | 0.415 |
| CF | Parietal | postcentral | LH | Group*Age | 0.0000 | 0.0000 | 0.56 | 0.570 |
| CF | Parietal | postcentral | RH | Group | 0.0002 | 0.0001 | 1.83 | 0.074 |
| CF | Parietal | postcentral | RH | Age | 0.0000 | 0.0000 | 1.95 | 0.057 |
| CF | Parietal | postcentral | RH | Group*Age | 0.0000 | 0.0000 | -0.86 | 0.398 |
| DM | Parietal | postcentral | LH | Group | -0.0209 | 0.0282 | -0.74 | 0.454 |
| DM | Parietal | postcentral | LH | Age | 0.0009 | 0.0016 | 0.58 | 0.567 |
| DM | Parietal | postcentral | LH | Group*Age | 0.0016 | 0.0025 | 0.66 | 0.529 |
| DM | Parietal | postcentral | RH | Group | -0.0102 | 0.0310 | -0.33 | 0.741 |
| DM | Parietal | postcentral | RH | Age | 0.0015 | 0.0018 | 0.82 | 0.427 |
| DM | Parietal | postcentral | RH | Group*Age | 0.0042 | 0.0028 | 1.52 | 0.131 |
| VF | Parietal | postcentral | LH | Group | 0.0001 | 0.0006 | 0.22 | 0.832 |
| VF | Parietal | postcentral | LH | Age | 0.0000 | 0.0000 | 0.74 | 0.455 |
| VF | Parietal | postcentral | LH | Group*Age | 0.0001 | 0.0001 | 1.27 | 0.211 |
| VF | Parietal | postcentral | RH | Group | 0.0009 | 0.0006 | 1.52 | 0.139 |
| VF | Parietal | postcentral | RH | Age | 0.0001 | 0.0000 | 2.28 | 0.026 |
| VF | Parietal | postcentral | RH | Group*Age | 0.0000 | 0.0001 | 0.08 | 0.940 |
| CF | Parietal | precuneus | LH | Group | 0.0000 | 0.0002 | -0.32 | 0.755 |
| CF | Parietal | precuneus | LH | Age | 0.0000 | 0.0000 | -2.01 | 0.045 |
| CF | Parietal | precuneus | LH | Group*Age | 0.0000 | 0.0000 | 0.62 | 0.525 |
| CF | Parietal | precuneus | RH | Group | 0.0001 | 0.0002 | 0.53 | 0.597 |
| CF | Parietal | precuneus | RH | Age | 0.0000 | 0.0000 | -1.07 | 0.286 |
| CF | Parietal | precuneus | RH | Group*Age | 0.0000 | 0.0000 | -0.04 | 0.965 |
| DM | Parietal | precuneus | LH | Group | -0.0107 | 0.0257 | -0.42 | 0.680 |
| DM | Parietal | precuneus | LH | Age | 0.0006 | 0.0015 | 0.39 | 0.707 |
| DM | Parietal | precuneus | LH | Group*Age | 0.0061 | 0.0023 | 2.68 | 0.008 |
| DM | Parietal | precuneus | RH | Group | -0.0293 | 0.0256 | -1.14 | 0.252 |
| DM | Parietal | precuneus | RH | Age | 0.0029 | 0.0015 | 1.96 | 0.048 |
| DM | Parietal | precuneus | RH | Group*Age | 0.0014 | 0.0023 | 0.60 | 0.550 |
| VF | Parietal | precuneus | LH | Group | -0.0008 | 0.0007 | -1.11 | 0.270 |
| VF | Parietal | precuneus | LH | Age | -0.0001 | 0.0000 | -1.62 | 0.106 |
| VF | Parietal | precuneus | LH | Group*Age | 0.0001 | 0.0001 | 2.07 | 0.046 |
| VF | Parietal | precuneus | RH | Group | 0.0000 | 0.0009 | 0.02 | 0.986 |
| VF | Parietal | precuneus | RH | Age | 0.0000 | 0.0001 | 0.22 | 0.830 |
| VF | Parietal | precuneus | RH | Group*Age | 0.0000 | 0.0001 | 0.42 | 0.667 |
| CF | Parietal | superiorparietal | LH | Group | -0.0001 | 0.0001 | -0.50 | 0.608 |
| CF | Parietal | superiorparietal | LH | Age | 0.0000 | 0.0000 | -1.34 | 0.182 |
| CF | Parietal | superiorparietal | LH | Group*Age | 0.0000 | 0.0000 | 1.16 | 0.248 |
| CF | Parietal | superiorparietal | RH | Group | 0.0001 | 0.0001 | 0.99 | 0.318 |
| CF | Parietal | superiorparietal | RH | Age | 0.0000 | 0.0000 | 0.34 | 0.722 |
| CF | Parietal | superiorparietal | RH | Group*Age | 0.0000 | 0.0000 | -0.40 | 0.695 |
| DM | Parietal | superiorparietal | LH | Group | -0.0320 | 0.0298 | -1.07 | 0.282 |
| DM | Parietal | superiorparietal | LH | Age | 0.0028 | 0.0017 | 1.66 | 0.101 |
| DM | Parietal | superiorparietal | LH | Group*Age | 0.0024 | 0.0027 | 0.91 | 0.369 |
| DM | Parietal | superiorparietal | RH | Group | -0.0548 | 0.0321 | -1.71 | 0.096 |
| DM | Parietal | superiorparietal | RH | Age | 0.0030 | 0.0018 | 1.65 | 0.100 |
| DM | Parietal | superiorparietal | RH | Group*Age | 0.0008 | 0.0029 | 0.30 | 0.764 |
| VF | Parietal | superiorparietal | LH | Group | -0.0008 | 0.0008 | -1.01 | 0.308 |
| VF | Parietal | superiorparietal | LH | Age | 0.0000 | 0.0000 | 0.43 | 0.666 |
| VF | Parietal | superiorparietal | LH | Group*Age | 0.0001 | 0.0001 | 1.26 | 0.217 |
| VF | Parietal | superiorparietal | RH | Group | -0.0005 | 0.0008 | -0.62 | 0.543 |
| VF | Parietal | superiorparietal | RH | Age | 0.0001 | 0.0000 | 1.24 | 0.218 |
| VF | Parietal | superiorparietal | RH | Group*Age | 0.0000 | 0.0001 | 0.36 | 0.709 |
| CF | Parietal | supramarginal | LH | Group | 0.0002 | 0.0001 | 1.82 | 0.072 |
| CF | Parietal | supramarginal | LH | Age | 0.0000 | 0.0000 | -0.07 | 0.949 |
| CF | Parietal | supramarginal | LH | Group*Age | 0.0000 | 0.0000 | 1.19 | 0.235 |
| CF | Parietal | supramarginal | RH | Group | 0.0003 | 0.0001 | 2.41 | 0.019 |
| CF | Parietal | supramarginal | RH | Age | 0.0000 | 0.0000 | 1.61 | 0.103 |
| CF | Parietal | supramarginal | RH | Group*Age | 0.0000 | 0.0000 | -0.63 | 0.530 |
| DM | Parietal | supramarginal | LH | Group | -0.0337 | 0.0318 | -1.06 | 0.290 |
| DM | Parietal | supramarginal | LH | Age | 0.0040 | 0.0018 | 2.19 | 0.028 |
| DM | Parietal | supramarginal | LH | Group*Age | 0.0031 | 0.0028 | 1.11 | 0.271 |
| DM | Parietal | supramarginal | RH | Group | -0.0385 | 0.0312 | -1.23 | 0.220 |
| DM | Parietal | supramarginal | RH | Age | 0.0029 | 0.0018 | 1.60 | 0.122 |
| DM | Parietal | supramarginal | RH | Group*Age | 0.0014 | 0.0028 | 0.49 | 0.627 |
| VF | Parietal | supramarginal | LH | Group | 0.0004 | 0.0010 | 0.43 | 0.678 |
| VF | Parietal | supramarginal | LH | Age | 0.0001 | 0.0001 | 1.75 | 0.084 |
| VF | Parietal | supramarginal | LH | Group*Age | 0.0001 | 0.0001 | 1.67 | 0.093 |
| VF | Parietal | supramarginal | RH | Group | 0.0010 | 0.0008 | 1.24 | 0.212 |
| VF | Parietal | supramarginal | RH | Age | 0.0001 | 0.0000 | 2.46 | 0.019 |
| VF | Parietal | supramarginal | RH | Group*Age | 0.0000 | 0.0001 | -0.05 | 0.959 |

**Supplementary Table 3. Linear regression results of WM-PVS in the temporal lobe**

| **Metric** | **Lobe** | **Mask** | **LH/RH** | **Term** | ***β*** | **SE** | ***t*** | ***p-perm*** |
| --- | --- | --- | --- | --- | --- | --- | --- | --- |
| CF | Temporal | entorhinal | LH | Group | -0.0004 | 0.0002 | -2.13 | 0.037 |
| CF | Temporal | entorhinal | LH | Age | 0.0000 | 0.0000 | -1.03 | 0.307 |
| CF | Temporal | entorhinal | LH | Group*Age | 0.0000 | 0.0000 | 0.19 | 0.843 |
| CF | Temporal | entorhinal | RH | Group | -0.0002 | 0.0002 | -1.21 | 0.231 |
| CF | Temporal | entorhinal | RH | Age | 0.0000 | 0.0000 | -1.03 | 0.312 |
| CF | Temporal | entorhinal | RH | Group*Age | 0.0000 | 0.0000 | 1.00 | 0.316 |
| DM | Temporal | entorhinal | LH | Group | -0.2781 | 0.1470 | -1.89 | 0.059 |
| DM | Temporal | entorhinal | LH | Age | -0.0042 | 0.0084 | -0.50 | 0.607 |
| DM | Temporal | entorhinal | LH | Group*Age | 0.0019 | 0.0131 | 0.15 | 0.886 |
| DM | Temporal | entorhinal | RH | Group | -0.1776 | 0.1506 | -1.18 | 0.238 |
| DM | Temporal | entorhinal | RH | Age | -0.0162 | 0.0086 | -1.88 | 0.060 |
| DM | Temporal | entorhinal | RH | Group*Age | 0.0249 | 0.0134 | 1.86 | 0.055 |
| VF | Temporal | entorhinal | LH | Group | -0.0008 | 0.0005 | -1.63 | 0.110 |
| VF | Temporal | entorhinal | LH | Age | 0.0000 | 0.0000 | -0.78 | 0.434 |
| VF | Temporal | entorhinal | LH | Group*Age | 0.0000 | 0.0000 | 0.26 | 0.787 |
| VF | Temporal | entorhinal | RH | Group | -0.0004 | 0.0004 | -1.21 | 0.225 |
| VF | Temporal | entorhinal | RH | Age | 0.0000 | 0.0000 | -1.69 | 0.094 |
| VF | Temporal | entorhinal | RH | Group*Age | 0.0001 | 0.0000 | 1.80 | 0.072 |
| CF | Temporal | fusiform | LH | Group | 0.0000 | 0.0001 | -0.20 | 0.847 |
| CF | Temporal | fusiform | LH | Age | 0.0000 | 0.0000 | 0.24 | 0.816 |
| CF | Temporal | fusiform | LH | Group*Age | 0.0000 | 0.0000 | 1.56 | 0.125 |
| CF | Temporal | fusiform | RH | Group | 0.0000 | 0.0001 | 0.02 | 0.981 |
| CF | Temporal | fusiform | RH | Age | 0.0000 | 0.0000 | -0.35 | 0.733 |
| CF | Temporal | fusiform | RH | Group*Age | 0.0000 | 0.0000 | -0.26 | 0.789 |
| DM | Temporal | fusiform | LH | Group | -0.0485 | 0.0266 | -1.82 | 0.071 |
| DM | Temporal | fusiform | LH | Age | 0.0020 | 0.0015 | 1.29 | 0.197 |
| DM | Temporal | fusiform | LH | Group*Age | 0.0050 | 0.0024 | 2.11 | 0.038 |
| DM | Temporal | fusiform | RH | Group | -0.0657 | 0.0391 | -1.68 | 0.082 |
| DM | Temporal | fusiform | RH | Age | 0.0028 | 0.0022 | 1.27 | 0.214 |
| DM | Temporal | fusiform | RH | Group*Age | 0.0001 | 0.0035 | 0.03 | 0.974 |
| VF | Temporal | fusiform | LH | Group | -0.0003 | 0.0006 | -0.51 | 0.627 |
| VF | Temporal | fusiform | LH | Age | 0.0000 | 0.0000 | 0.63 | 0.524 |
| VF | Temporal | fusiform | LH | Group*Age | 0.0001 | 0.0001 | 1.94 | 0.062 |
| VF | Temporal | fusiform | RH | Group | -0.0001 | 0.0005 | -0.25 | 0.796 |
| VF | Temporal | fusiform | RH | Age | 0.0000 | 0.0000 | 0.51 | 0.612 |
| VF | Temporal | fusiform | RH | Group*Age | 0.0000 | 0.0000 | -0.28 | 0.782 |
| CF | Temporal | inferiortemporal | LH | Group | 0.0002 | 0.0001 | 1.26 | 0.209 |
| CF | Temporal | inferiortemporal | LH | Age | 0.0000 | 0.0000 | 0.11 | 0.916 |
| CF | Temporal | inferiortemporal | LH | Group*Age | 0.0000 | 0.0000 | 1.73 | 0.086 |
| CF | Temporal | inferiortemporal | RH | Group | 0.0000 | 0.0001 | -0.05 | 0.955 |
| CF | Temporal | inferiortemporal | RH | Age | 0.0000 | 0.0000 | 1.89 | 0.064 |
| CF | Temporal | inferiortemporal | RH | Group*Age | 0.0000 | 0.0000 | -0.88 | 0.378 |
| DM | Temporal | inferiortemporal | LH | Group | 0.0050 | 0.0207 | 0.24 | 0.807 |
| DM | Temporal | inferiortemporal | LH | Age | 0.0027 | 0.0012 | 2.27 | 0.024 |
| DM | Temporal | inferiortemporal | LH | Group*Age | 0.0035 | 0.0018 | 1.89 | 0.059 |
| DM | Temporal | inferiortemporal | RH | Group | 0.0035 | 0.0205 | 0.17 | 0.858 |
| DM | Temporal | inferiortemporal | RH | Age | 0.0015 | 0.0012 | 1.30 | 0.201 |
| DM | Temporal | inferiortemporal | RH | Group*Age | 0.0027 | 0.0018 | 1.50 | 0.137 |
| VF | Temporal | inferiortemporal | LH | Group | 0.0004 | 0.0006 | 0.70 | 0.489 |
| VF | Temporal | inferiortemporal | LH | Age | 0.0000 | 0.0000 | 1.24 | 0.214 |
| VF | Temporal | inferiortemporal | LH | Group*Age | 0.0001 | 0.0001 | 2.39 | 0.021 |
| VF | Temporal | inferiortemporal | RH | Group | 0.0001 | 0.0006 | 0.22 | 0.835 |
| VF | Temporal | inferiortemporal | RH | Age | 0.0001 | 0.0000 | 2.06 | 0.040 |
| VF | Temporal | inferiortemporal | RH | Group*Age | 0.0000 | 0.0001 | -0.32 | 0.755 |
| CF | Temporal | middletemporal | LH | Group | 0.0002 | 0.0001 | 1.60 | 0.115 |
| CF | Temporal | middletemporal | LH | Age | 0.0000 | 0.0000 | 2.07 | 0.041 |
| CF | Temporal | middletemporal | LH | Group*Age | 0.0000 | 0.0000 | 0.83 | 0.415 |
| CF | Temporal | middletemporal | RH | Group | 0.0001 | 0.0001 | 0.46 | 0.648 |
| CF | Temporal | middletemporal | RH | Age | 0.0000 | 0.0000 | 1.99 | 0.051 |
| CF | Temporal | middletemporal | RH | Group*Age | 0.0000 | 0.0000 | -0.98 | 0.330 |
| DM | Temporal | middletemporal | LH | Group | -0.0349 | 0.0241 | -1.45 | 0.147 |
| DM | Temporal | middletemporal | LH | Age | 0.0010 | 0.0014 | 0.75 | 0.454 |
| DM | Temporal | middletemporal | LH | Group*Age | 0.0027 | 0.0021 | 1.24 | 0.234 |
| DM | Temporal | middletemporal | RH | Group | -0.0148 | 0.0247 | -0.60 | 0.555 |
| DM | Temporal | middletemporal | RH | Age | 0.0017 | 0.0014 | 1.23 | 0.213 |
| DM | Temporal | middletemporal | RH | Group*Age | 0.0016 | 0.0022 | 0.74 | 0.456 |
| VF | Temporal | middletemporal | LH | Group | 0.0001 | 0.0006 | 0.13 | 0.893 |
| VF | Temporal | middletemporal | LH | Age | 0.0001 | 0.0000 | 2.23 | 0.028 |
| VF | Temporal | middletemporal | LH | Group*Age | 0.0001 | 0.0001 | 1.03 | 0.297 |
| VF | Temporal | middletemporal | RH | Group | 0.0000 | 0.0006 | -0.08 | 0.936 |
| VF | Temporal | middletemporal | RH | Age | 0.0001 | 0.0000 | 2.36 | 0.021 |
| VF | Temporal | middletemporal | RH | Group*Age | 0.0000 | 0.0001 | -0.76 | 0.456 |
| CF | Temporal | parahippocampal | LH | Group | -0.0002 | 0.0001 | -1.86 | 0.063 |
| CF | Temporal | parahippocampal | LH | Age | 0.0000 | 0.0000 | 0.45 | 0.662 |
| CF | Temporal | parahippocampal | LH | Group*Age | 0.0000 | 0.0000 | -0.12 | 0.899 |
| CF | Temporal | parahippocampal | RH | Group | -0.0001 | 0.0001 | -0.73 | 0.477 |
| CF | Temporal | parahippocampal | RH | Age | 0.0000 | 0.0000 | -0.23 | 0.820 |
| CF | Temporal | parahippocampal | RH | Group*Age | 0.0000 | 0.0000 | 0.67 | 0.510 |
| DM | Temporal | parahippocampal | LH | Group | -0.4256 | 0.1644 | -2.59 | 0.011 |
| DM | Temporal | parahippocampal | LH | Age | 0.0008 | 0.0094 | 0.08 | 0.938 |
| DM | Temporal | parahippocampal | LH | Group*Age | 0.0023 | 0.0146 | 0.15 | 0.879 |
| DM | Temporal | parahippocampal | RH | Group | -0.2499 | 0.1623 | -1.54 | 0.122 |
| DM | Temporal | parahippocampal | RH | Age | 0.0078 | 0.0093 | 0.84 | 0.403 |
| DM | Temporal | parahippocampal | RH | Group*Age | -0.0121 | 0.0144 | -0.84 | 0.417 |
| VF | Temporal | parahippocampal | LH | Group | -0.0006 | 0.0005 | -1.40 | 0.168 |
| VF | Temporal | parahippocampal | LH | Age | 0.0000 | 0.0000 | -0.10 | 0.925 |
| VF | Temporal | parahippocampal | LH | Group*Age | 0.0000 | 0.0000 | 0.76 | 0.458 |
| VF | Temporal | parahippocampal | RH | Group | -0.0001 | 0.0004 | -0.36 | 0.732 |
| VF | Temporal | parahippocampal | RH | Age | 0.0000 | 0.0000 | 0.50 | 0.607 |
| VF | Temporal | parahippocampal | RH | Group*Age | 0.0000 | 0.0000 | 0.48 | 0.634 |
| CF | Temporal | superiortemporal | LH | Group | 0.0001 | 0.0001 | 0.55 | 0.567 |
| CF | Temporal | superiortemporal | LH | Age | 0.0000 | 0.0000 | -1.65 | 0.105 |
| CF | Temporal | superiortemporal | LH | Group*Age | 0.0000 | 0.0000 | 1.88 | 0.069 |
| CF | Temporal | superiortemporal | RH | Group | 0.0001 | 0.0001 | 0.94 | 0.359 |
| CF | Temporal | superiortemporal | RH | Age | 0.0000 | 0.0000 | 0.93 | 0.349 |
| CF | Temporal | superiortemporal | RH | Group*Age | 0.0000 | 0.0000 | -0.37 | 0.713 |
| DM | Temporal | superiortemporal | LH | Group | 0.0008 | 0.0203 | 0.04 | 0.968 |
| DM | Temporal | superiortemporal | LH | Age | 0.0002 | 0.0012 | 0.13 | 0.887 |
| DM | Temporal | superiortemporal | LH | Group*Age | 0.0033 | 0.0018 | 1.81 | 0.069 |
| DM | Temporal | superiortemporal | RH | Group | -0.0335 | 0.0231 | -1.45 | 0.140 |
| DM | Temporal | superiortemporal | RH | Age | -0.0002 | 0.0013 | -0.15 | 0.886 |
| DM | Temporal | superiortemporal | RH | Group*Age | 0.0026 | 0.0021 | 1.29 | 0.193 |
| VF | Temporal | superiortemporal | LH | Group | 0.0002 | 0.0006 | 0.30 | 0.752 |
| VF | Temporal | superiortemporal | LH | Age | 0.0000 | 0.0000 | -0.64 | 0.526 |
| VF | Temporal | superiortemporal | LH | Group*Age | 0.0001 | 0.0001 | 1.82 | 0.067 |
| VF | Temporal | superiortemporal | RH | Group | -0.0001 | 0.0005 | -0.15 | 0.876 |
| VF | Temporal | superiortemporal | RH | Age | 0.0000 | 0.0000 | 1.04 | 0.301 |
| VF | Temporal | superiortemporal | RH | Group*Age | 0.0000 | 0.0000 | 0.16 | 0.869 |
| CF | Temporal | temporalpole | LH | Group | -0.0001 | 0.0002 | -0.53 | 0.595 |
| CF | Temporal | temporalpole | LH | Age | 0.0000 | 0.0000 | -0.61 | 0.538 |
| CF | Temporal | temporalpole | LH | Group*Age | 0.0000 | 0.0000 | 0.37 | 0.718 |
| CF | Temporal | temporalpole | RH | Group | -0.0004 | 0.0002 | -1.96 | 0.054 |
| CF | Temporal | temporalpole | RH | Age | 0.0000 | 0.0000 | -0.01 | 0.992 |
| CF | Temporal | temporalpole | RH | Group*Age | 0.0000 | 0.0000 | 0.44 | 0.659 |
| DM | Temporal | temporalpole | LH | Group | -0.0004 | 0.1301 | 0.00 | 0.997 |
| DM | Temporal | temporalpole | LH | Age | 0.0010 | 0.0075 | 0.13 | 0.895 |
| DM | Temporal | temporalpole | LH | Group*Age | -0.0088 | 0.0116 | -0.76 | 0.440 |
| DM | Temporal | temporalpole | RH | Group | -0.2718 | 0.1458 | -1.86 | 0.061 |
| DM | Temporal | temporalpole | RH | Age | 0.0026 | 0.0084 | 0.31 | 0.753 |
| DM | Temporal | temporalpole | RH | Group*Age | 0.0072 | 0.0130 | 0.56 | 0.577 |
| VF | Temporal | temporalpole | LH | Group | 0.0002 | 0.0006 | 0.40 | 0.686 |
| VF | Temporal | temporalpole | LH | Age | 0.0000 | 0.0000 | -1.17 | 0.239 |
| VF | Temporal | temporalpole | LH | Group*Age | 0.0000 | 0.0000 | 0.96 | 0.343 |
| VF | Temporal | temporalpole | RH | Group | -0.0007 | 0.0005 | -1.33 | 0.191 |
| VF | Temporal | temporalpole | RH | Age | 0.0000 | 0.0000 | -1.16 | 0.241 |
| VF | Temporal | temporalpole | RH | Group*Age | 0.0001 | 0.0000 | 1.39 | 0.177 |
| CF | Temporal | transversetemporal | LH | Group | -0.0002 | 0.0003 | -0.55 | 0.585 |
| CF | Temporal | transversetemporal | LH | Age | 0.0000 | 0.0000 | 0.96 | 0.339 |
| CF | Temporal | transversetemporal | LH | Group*Age | 0.0000 | 0.0000 | -0.46 | 0.648 |
| CF | Temporal | transversetemporal | RH | Group | 0.0009 | 0.0004 | 2.48 | 0.014 |
| CF | Temporal | transversetemporal | RH | Age | 0.0000 | 0.0000 | 1.39 | 0.169 |
| CF | Temporal | transversetemporal | RH | Group*Age | 0.0000 | 0.0000 | -1.35 | 0.195 |
| DM | Temporal | transversetemporal | LH | Group | -0.0524 | 0.0947 | -0.55 | 0.579 |
| DM | Temporal | transversetemporal | LH | Age | 0.0037 | 0.0054 | 0.68 | 0.499 |
| DM | Temporal | transversetemporal | LH | Group*Age | 0.0071 | 0.0084 | 0.84 | 0.406 |
| DM | Temporal | transversetemporal | RH | Group | -0.0101 | 0.1307 | -0.08 | 0.943 |
| DM | Temporal | transversetemporal | RH | Age | 0.0018 | 0.0075 | 0.24 | 0.813 |
| DM | Temporal | transversetemporal | RH | Group*Age | -0.0024 | 0.0116 | -0.21 | 0.833 |
| VF | Temporal | transversetemporal | LH | Group | -0.0009 | 0.0010 | -0.88 | 0.381 |
| VF | Temporal | transversetemporal | LH | Age | 0.0001 | 0.0001 | 1.77 | 0.082 |
| VF | Temporal | transversetemporal | LH | Group*Age | -0.0001 | 0.0001 | -0.83 | 0.411 |
| VF | Temporal | transversetemporal | RH | Group | 0.0034 | 0.0015 | 2.32 | 0.021 |
| VF | Temporal | transversetemporal | RH | Age | 0.0001 | 0.0001 | 1.08 | 0.287 |
| VF | Temporal | transversetemporal | RH | Group*Age | -0.0001 | 0.0001 | -0.52 | 0.594 |

**Supplementary Table 4. Linear regression results of WM-PVS in the occipital lobe**

| **Metric** | **Lobe** | **Mask** | **LH/RH** | **Term** | ***β*** | **SE** | ***t*** | ***p-perm*** |
| --- | --- | --- | --- | --- | --- | --- | --- | --- |
| CF | Occipital | cuneus | LH | Group | 0.0000 | 0.0001 | 0.19 | 0.844 |
| CF | Occipital | cuneus | LH | Age | 0.0000 | 0.0000 | -1.11 | 0.277 |
| CF | Occipital | cuneus | LH | Group*Age | 0.0000 | 0.0000 | 1.17 | 0.249 |
| CF | Occipital | cuneus | RH | Group | 0.0001 | 0.0001 | 1.54 | 0.131 |
| CF | Occipital | cuneus | RH | Age | 0.0000 | 0.0000 | -0.68 | 0.501 |
| CF | Occipital | cuneus | RH | Group*Age | 0.0000 | 0.0000 | 0.50 | 0.613 |
| DM | Occipital | cuneus | LH | Group | -0.1200 | 0.1607 | -0.75 | 0.456 |
| DM | Occipital | cuneus | LH | Age | -0.0086 | 0.0092 | -0.93 | 0.346 |
| DM | Occipital | cuneus | LH | Group*Age | 0.0128 | 0.0143 | 0.90 | 0.363 |
| DM | Occipital | cuneus | RH | Group | 0.0324 | 0.1718 | 0.19 | 0.852 |
| DM | Occipital | cuneus | RH | Age | -0.0067 | 0.0099 | -0.68 | 0.502 |
| DM | Occipital | cuneus | RH | Group*Age | -0.0017 | 0.0153 | -0.11 | 0.911 |
| VF | Occipital | cuneus | LH | Group | -0.0001 | 0.0003 | -0.19 | 0.856 |
| VF | Occipital | cuneus | LH | Age | 0.0000 | 0.0000 | -1.32 | 0.186 |
| VF | Occipital | cuneus | LH | Group*Age | 0.0000 | 0.0000 | 1.21 | 0.231 |
| VF | Occipital | cuneus | RH | Group | -0.0001 | 0.0003 | -0.44 | 0.667 |
| VF | Occipital | cuneus | RH | Age | 0.0000 | 0.0000 | -1.46 | 0.149 |
| VF | Occipital | cuneus | RH | Group*Age | 0.0000 | 0.0000 | 0.85 | 0.399 |
| CF | Occipital | lateraloccipital | LH | Group | 0.0000 | 0.0001 | 0.59 | 0.545 |
| CF | Occipital | lateraloccipital | LH | Age | 0.0000 | 0.0000 | 1.53 | 0.122 |
| CF | Occipital | lateraloccipital | LH | Group*Age | 0.0000 | 0.0000 | 0.97 | 0.338 |
| CF | Occipital | lateraloccipital | RH | Group | 0.0000 | 0.0001 | 0.01 | 0.992 |
| CF | Occipital | lateraloccipital | RH | Age | 0.0000 | 0.0000 | 1.11 | 0.268 |
| CF | Occipital | lateraloccipital | RH | Group*Age | 0.0000 | 0.0000 | 0.43 | 0.671 |
| DM | Occipital | lateraloccipital | LH | Group | -0.0120 | 0.0913 | -0.13 | 0.894 |
| DM | Occipital | lateraloccipital | LH | Age | -0.0036 | 0.0052 | -0.70 | 0.493 |
| DM | Occipital | lateraloccipital | LH | Group*Age | 0.0141 | 0.0081 | 1.73 | 0.089 |
| DM | Occipital | lateraloccipital | RH | Group | -0.0943 | 0.0828 | -1.14 | 0.277 |
| DM | Occipital | lateraloccipital | RH | Age | 0.0045 | 0.0048 | 0.95 | 0.342 |
| DM | Occipital | lateraloccipital | RH | Group*Age | 0.0093 | 0.0074 | 1.26 | 0.214 |
| VF | Occipital | lateraloccipital | LH | Group | 0.0004 | 0.0004 | 0.88 | 0.404 |
| VF | Occipital | lateraloccipital | LH | Age | 0.0000 | 0.0000 | 0.67 | 0.491 |
| VF | Occipital | lateraloccipital | LH | Group*Age | 0.0000 | 0.0000 | 1.36 | 0.177 |
| VF | Occipital | lateraloccipital | RH | Group | 0.0000 | 0.0003 | 0.10 | 0.922 |
| VF | Occipital | lateraloccipital | RH | Age | 0.0000 | 0.0000 | 0.94 | 0.344 |
| VF | Occipital | lateraloccipital | RH | Group*Age | 0.0000 | 0.0000 | 0.35 | 0.721 |
| CF | Occipital | lingual | LH | Group | -0.0001 | 0.0001 | -1.10 | 0.278 |
| CF | Occipital | lingual | LH | Age | 0.0000 | 0.0000 | 0.72 | 0.469 |
| CF | Occipital | lingual | LH | Group*Age | 0.0000 | 0.0000 | -0.72 | 0.473 |
| CF | Occipital | lingual | RH | Group | 0.0000 | 0.0001 | 0.07 | 0.939 |
| CF | Occipital | lingual | RH | Age | 0.0000 | 0.0000 | 0.18 | 0.864 |
| CF | Occipital | lingual | RH | Group*Age | 0.0000 | 0.0000 | -0.40 | 0.700 |
| DM | Occipital | lingual | LH | Group | -0.3454 | 0.1623 | -2.13 | 0.036 |
| DM | Occipital | lingual | LH | Age | -0.0198 | 0.0093 | -2.13 | 0.037 |
| DM | Occipital | lingual | LH | Group*Age | 0.0262 | 0.0144 | 1.82 | 0.070 |
| DM | Occipital | lingual | RH | Group | -0.0397 | 0.1580 | -0.25 | 0.802 |
| DM | Occipital | lingual | RH | Age | 0.0060 | 0.0091 | 0.66 | 0.519 |
| DM | Occipital | lingual | RH | Group*Age | -0.0043 | 0.0140 | -0.31 | 0.759 |
| VF | Occipital | lingual | LH | Group | -0.0004 | 0.0003 | -1.49 | 0.138 |
| VF | Occipital | lingual | LH | Age | 0.0000 | 0.0000 | 0.90 | 0.366 |
| VF | Occipital | lingual | LH | Group*Age | 0.0000 | 0.0000 | -0.81 | 0.428 |
| VF | Occipital | lingual | RH | Group | 0.0000 | 0.0003 | -0.04 | 0.963 |
| VF | Occipital | lingual | RH | Age | 0.0000 | 0.0000 | 0.61 | 0.526 |
| VF | Occipital | lingual | RH | Group*Age | 0.0000 | 0.0000 | -0.43 | 0.655 |
| CF | Occipital | pericalcarine | LH | Group | -0.0002 | 0.0001 | -1.72 | 0.089 |
| CF | Occipital | pericalcarine | LH | Age | 0.0000 | 0.0000 | 0.36 | 0.717 |
| CF | Occipital | pericalcarine | LH | Group*Age | 0.0000 | 0.0000 | 0.00 | 1.000 |
| CF | Occipital | pericalcarine | RH | Group | 0.0000 | 0.0001 | -0.45 | 0.666 |
| CF | Occipital | pericalcarine | RH | Age | 0.0000 | 0.0000 | -0.93 | 0.352 |
| CF | Occipital | pericalcarine | RH | Group*Age | 0.0000 | 0.0000 | 0.50 | 0.620 |
| DM | Occipital | pericalcarine | LH | Group | -0.1924 | 0.1906 | -1.01 | 0.307 |
| DM | Occipital | pericalcarine | LH | Age | -0.0121 | 0.0109 | -1.11 | 0.266 |
| DM | Occipital | pericalcarine | LH | Group*Age | 0.0024 | 0.0169 | 0.14 | 0.887 |
| DM | Occipital | pericalcarine | RH | Group | -0.1060 | 0.1916 | -0.55 | 0.589 |
| DM | Occipital | pericalcarine | RH | Age | -0.0011 | 0.0110 | -0.10 | 0.917 |
| DM | Occipital | pericalcarine | RH | Group*Age | -0.0002 | 0.0170 | -0.01 | 0.990 |
| VF | Occipital | pericalcarine | LH | Group | -0.0016 | 0.0008 | -1.98 | 0.048 |
| VF | Occipital | pericalcarine | LH | Age | 0.0000 | 0.0000 | -0.57 | 0.561 |
| VF | Occipital | pericalcarine | LH | Group*Age | 0.0000 | 0.0001 | 0.07 | 0.947 |
| VF | Occipital | pericalcarine | RH | Group | -0.0014 | 0.0009 | -1.64 | 0.105 |
| VF | Occipital | pericalcarine | RH | Age | 0.0000 | 0.0000 | -0.75 | 0.455 |
| VF | Occipital | pericalcarine | RH | Group*Age | 0.0000 | 0.0001 | 0.25 | 0.807 |
